# Supplementary material for: Selection of microRNAs in extracellular vesicles for diagnosis of malignant pleural mesothelioma by in vitro analysis
Source: PubMed Central journal article supplement — Oncol Rep. 2020 Sep 22;44(5):2198–210. doi: 10.3892/or.2020.7778 (PMC7551269; doi:10.3892/or.2020.7778), 2020-09-22
Supplement: Supplementary_Data.pdf [file Supplementary_Data.pdf]

Figure S1. Schematic diagram of isolation and removal of EVs using syringe filters. EVpas220, medium obtained by passing through a 220-nm syringe filter. EVpas50/220, medium obtained by passing EVpas220 through a 50-nm syringe filter. EVpas20/50, medium obtained by passing EVpas50/220 through a 20-nm syringe filter. EVcap50/220, EV captured by passing the EVpas220 through a 50-nm syringe filter. EVrev50/220, EV obtained by reverse flowing EVcap50/220. EVs, extracellular vesicles; FBS, fetal bovine serum.

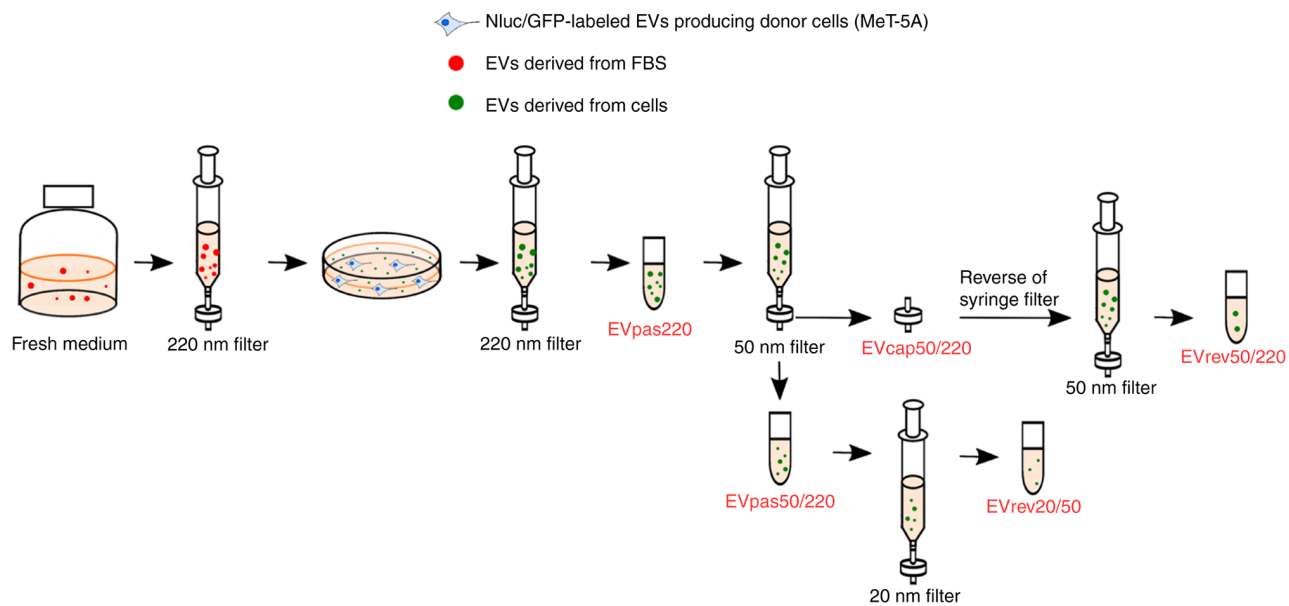

Figure S2. Expression, secretion, and uptake of CD9-GFP. (A) MeT-5A cells expressing CD9-GFP (donor cells) and MeT-5A cells uptaking EV expressing CD9-GFP (recipient cells) were observed under a fluorescence microscope. Bright field and GFP images were superimposed and shown as 'Merge'; length of the scale bar is 200  $\mu\text{m}$ . (B) EVs concentrated from a medium containing EV expressing CD9-GFP (Cultured medium) or a medium not containing EV (Fresh medium) was observed with a fluorescence microscope. The length of the scale bar is 100  $\mu\text{m}$ . EVs, extracellular vesicles; GFP, green fluorescence protein.

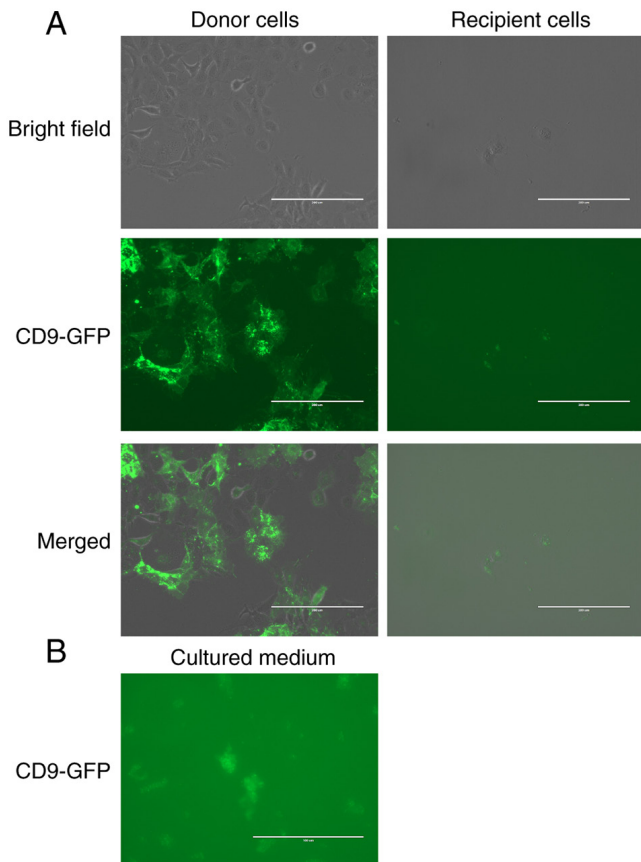

Figure S3. Expression, secretion and uptake of CD63-GFP. (A) MeT-5A cells expressing CD63-GFP (donor cells) and MeT-5A cells uptaking EV expressing CD63-GFP (recipient cells) were observed under a fluorescence microscope. Bright field and GFP images were superimposed and shown as 'Merge'; length of the scale bar is 200  $\mu\text{m}$ . (B) EVs concentrated from a medium containing EV expressing CD63-GFP (Cultured medium) or a medium not containing EV (Fresh medium) was observed with a fluorescence microscope. The length of the scale bar is 100  $\mu\text{m}$ . EVs, extracellular vesicles; GFP, green fluorescence protein.

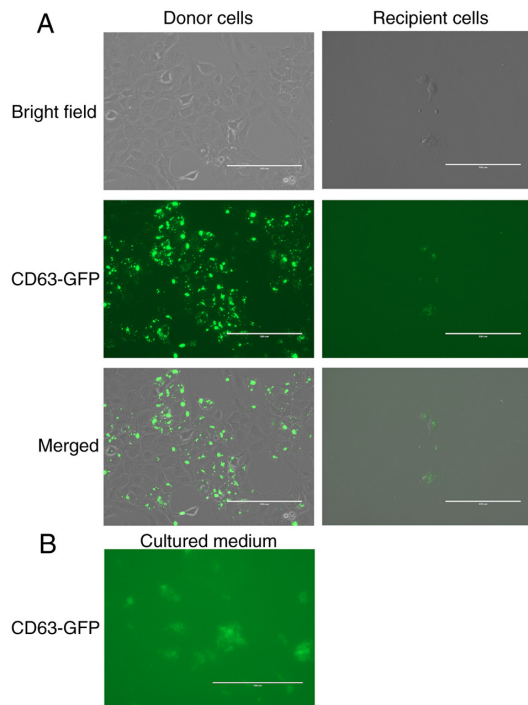

Table SI. Sequences of the microRNAs used for establishment of the overexpressing cell lines.

| MicroRNA        | Sequence                                                                                                              |
|-----------------|-----------------------------------------------------------------------------------------------------------------------|
| hsa-miR-4728-5p | GGATCCGTGGGAGGGGAGAGGCAGCAAGCACACAGGGCCTGGGACTAGCATGCTGACCTCC<br>TCCTGCCCCAGTTTTTGAATTC                               |
| hsa-miR-193a-5p | GGATCCCGAGGATGGGAGCTGAGGGCTGGGTCTTTGCGGGCGAGATGAGGGTGTCCGATCAAC<br>TGGCCTACAAAGTCCCAGTTCTCGGCCCCCGTTTTTGAATTC         |
| hsa-miR-551b-5p | GGATCCAGATGTGCTCTCCTGGCCCATGAAATCAAGCGTGGGTGAGACCTGGTGCAGAACGGG<br>AAGGCGACCCATACTTGGTTTCAGAGGCTGTGAGAATAATTTTTGAATTC |

hsa, human (*Homo sapiens*).
